# Supplementary material
Source: PubMed Central journal article supplement (PMC4538327)
Supplement: NIHMS714712-supplement-3.pdf [file NIHMS714712-supplement-3.pdf]

| NAME                                    | SIZE | ES         | NES       | NOM p-val   | FDR q-val   |
|-----------------------------------------|------|------------|-----------|-------------|-------------|
| EMBRYONIC SKELETAL SYSTEM MORPHOGENESIS | 38   | 0.6288416  | 2.1728466 | 0           | 0.02975675  |
| SKELETAL SYSTEM MORPHOGENESIS           | 59   | 0.55073005 | 2.13318   | 0           | 0.030187136 |
| CALCIUM-DEPENDENT CELL-CELL ADHESION    | 20   | 0.6946526  | 2.0455294 | 0           | 0.06949832  |
| TELENCEPHALON DEVELOPMENT               | 31   | 0.60968775 | 2.00732   | 0           | 0.07631144  |
| MYOSIN BINDING                          | 16   | 0.6836724  | 1.8816973 | 0           | 0.245915    |
| EMBRYONIC SKELETAL SYSTEM DEVELOPMENT   | 48   | 0.50056005 | 1.8509072 | 0           | 0.2772813   |
| VISUAL BEHAVIOR                         | 17   | 0.65191424 | 1.820038  | 0.003636364 | 0.31764138  |
| CARDIAC MUSCLE TISSUE MORPHOGENESIS     | 22   | 0.59200406 | 1.8174658 | 0.007220217 | 0.28325993  |
| SYNAPTOGENESIS                          | 24   | 0.5801884  | 1.8148645 | 0.010948905 | 0.25809416  |
| ANTERIOR/POSTERIOR PATTERN FORMATION    | 85   | 0.44568273 | 1.7953715 | 0           | 0.27612448  |
| MUSCLE TISSUE MORPHOGENESIS             | 22   | 0.59200406 | 1.7773362 | 0.0041841   | 0.2934047   |
| P75 NTR RECEPTOR-MEDIATED SIGNALLING    | 23   | 0.5669475  | 1.7748189 | 0.003831418 | 0.27409053  |
| NFG AND PRONGF BINDS TO P75NTR          | 15   | 0.6159971  | 1.7337782 | 0.003436426 | 0.3485719   |
| REGIONALIZATION                         | 123  | 0.40838727 | 1.7208426 | 0           | 0.35981524  |
| SYNAPSE ORGANIZATION                    | 40   | 0.48794332 | 1.6862694 | 0.004854369 | 0.43808013  |
| VISUAL LEARNING                         | 15   | 0.61090875 | 1.6572523 | 0.02310231  | 0.5085607   |
| NEUROBLAST PROLIFERATION                | 21   | 0.55655146 | 1.6491615 | 0.022900764 | 0.50605017  |
| AXON EXTENSION                          | 19   | 0.5389787  | 1.6355002 | 0.032490976 | 0.52864146  |
| CELL FATE SPECIFICATION                 | 24   | 0.5166822  | 1.6030097 | 0.03731343  | 0.6254812   |
| CELL FATE DETERMINATION                 | 27   | 0.50082505 | 1.6001633 | 0.029166667 | 0.60631186  |

| FWER p-val | RANK AT MAX | LEADING EDGE                   |
|------------|-------------|--------------------------------|
| 0.03       | 680         | tags=18%, list=4%, signal=19%  |
| 0.06       | 680         | tags=17%, list=4%, signal=18%  |
| 0.19       | 636         | tags=45%, list=4%, signal=47%  |
| 0.261      | 1583        | tags=29%, list=9%, signal=32%  |
| 0.695      | 1076        | tags=25%, list=6%, signal=27%  |
| 0.804      | 270         | tags=13%, list=2%, signal=13%  |
| 0.881      | 2028        | tags=35%, list=12%, signal=40% |
| 0.89       | 277         | tags=14%, list=2%, signal=14%  |
| 0.893      | 636         | tags=38%, list=4%, signal=39%  |
| 0.93       | 1810        | tags=18%, list=11%, signal=20% |
| 0.953      | 277         | tags=14%, list=2%, signal=14%  |
| 0.956      | 2172        | tags=26%, list=13%, signal=30% |
| 0.99       | 2172        | tags=33%, list=13%, signal=38% |
| 0.995      | 1522        | tags=18%, list=9%, signal=20%  |
| 1          | 1134        | tags=33%, list=7%, signal=35%  |
| 1          | 584         | tags=20%, list=3%, signal=21%  |
| 1          | 1493        | tags=33%, list=9%, signal=37%  |
| 1          | 1962        | tags=32%, list=12%, signal=36% |
| 1          | 2646        | tags=38%, list=16%, signal=44% |
| 1          | 189         | tags=15%, list=1%, signal=15%  |
