# Supplementary material
Source: PubMed Central journal article supplement (PMC4538327)

# Northcott et al. Supplementary Figure 1.

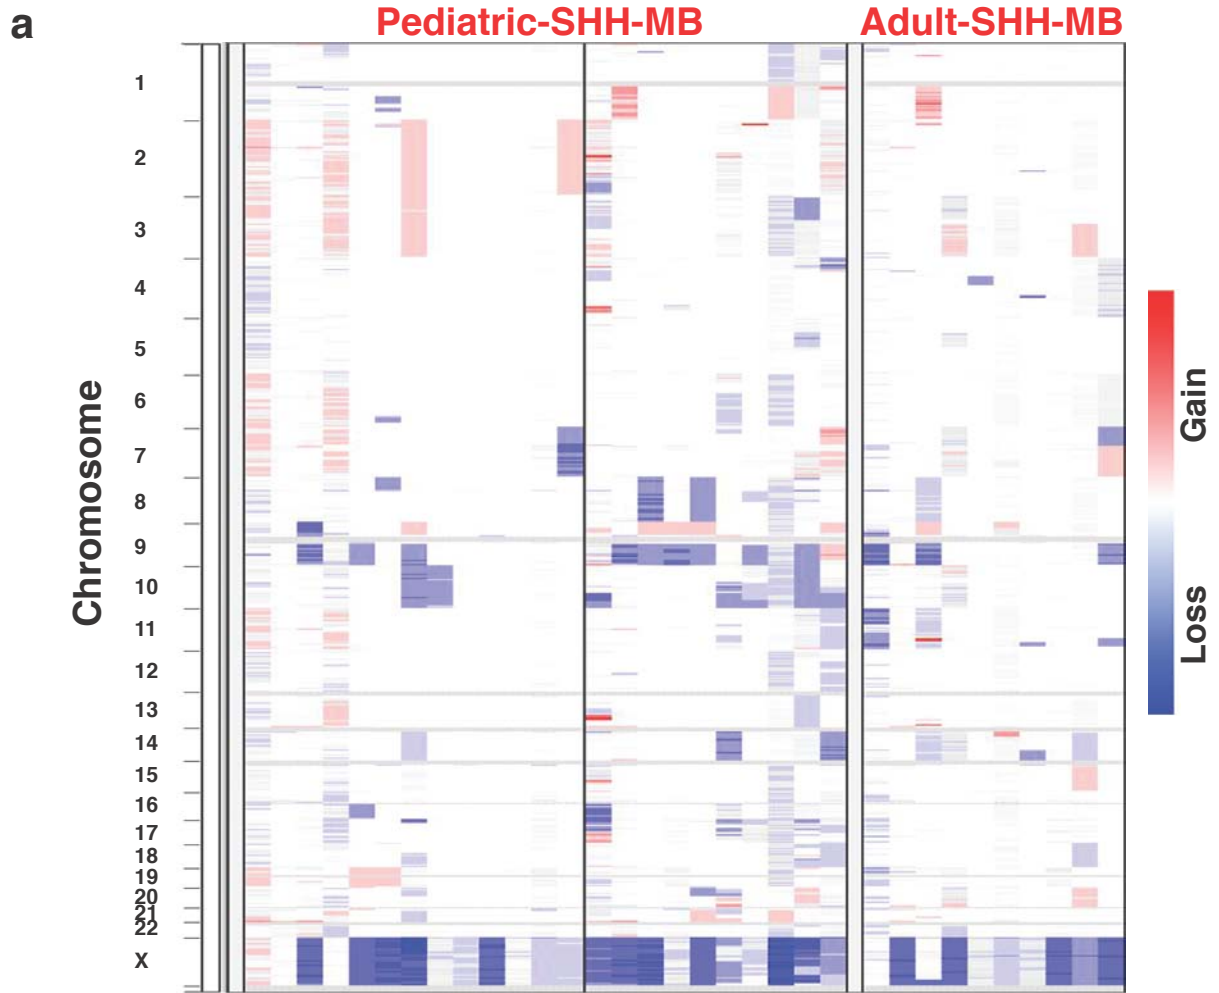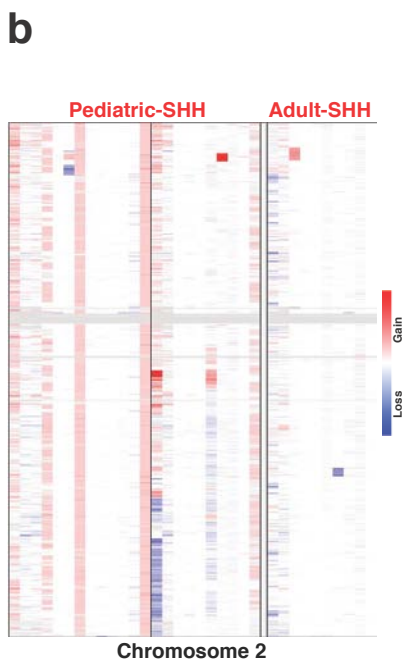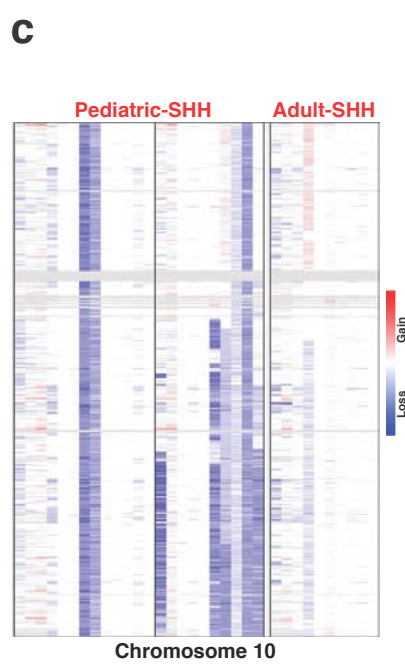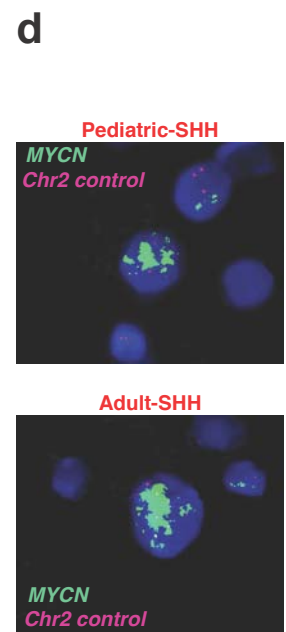

Supplement: NIHMS714712-supplement-1.pdf [file NIHMS714712-supplement-1.pdf]

# Northcott et al. Supplementary Figure 2.

**a**

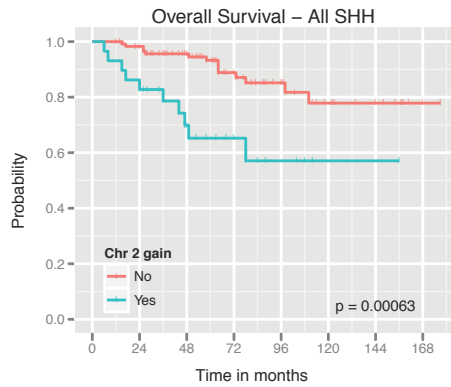

|     |     |     |    |    |    |    |    |   |
|-----|-----|-----|----|----|----|----|----|---|
| Yes | 29  | 24  | 16 | 9  | 4  | 1  | 1  | 0 |
| No  | 121 | 113 | 89 | 53 | 28 | 15 | 10 | 2 |

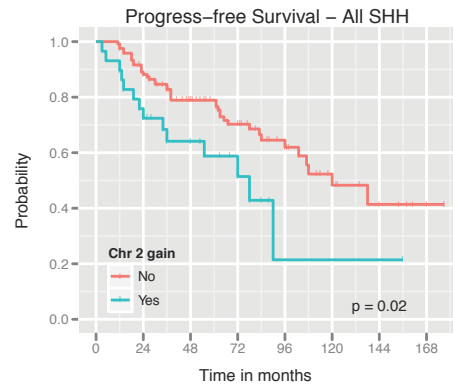

|     |     |     |    |    |    |    |   |   |
|-----|-----|-----|----|----|----|----|---|---|
| Yes | 29  | 21  | 14 | 7  | 1  | 1  | 1 | 0 |
| No  | 121 | 103 | 77 | 47 | 24 | 12 | 6 | 2 |

**b**

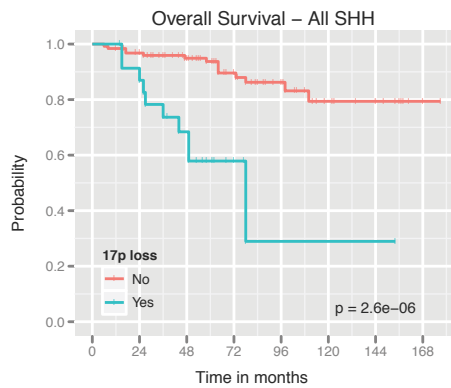

|     |     |     |    |    |    |    |    |   |
|-----|-----|-----|----|----|----|----|----|---|
| Yes | 25  | 20  | 13 | 5  | 1  | 1  | 1  | 0 |
| No  | 125 | 117 | 92 | 57 | 31 | 15 | 10 | 2 |

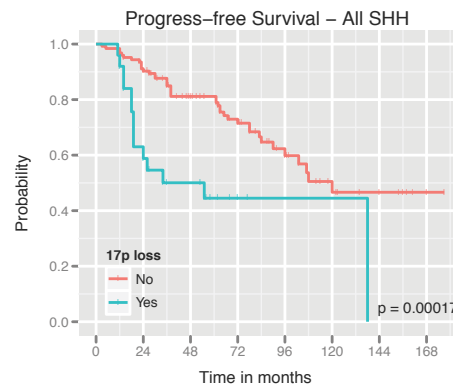

|     |     |     |    |    |    |    |   |   |
|-----|-----|-----|----|----|----|----|---|---|
| Yes | 25  | 14  | 10 | 4  | 1  | 1  | 0 | 0 |
| No  | 125 | 110 | 81 | 50 | 24 | 12 | 7 | 2 |

**c**

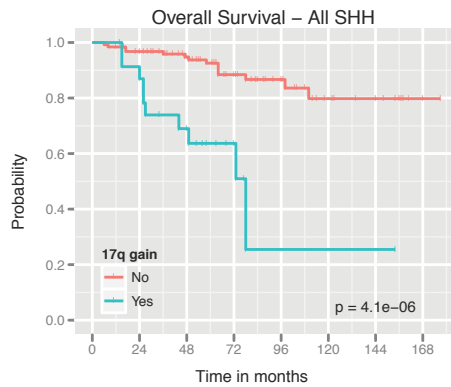

|     |     |     |    |    |    |    |    |   |
|-----|-----|-----|----|----|----|----|----|---|
| Yes | 25  | 20  | 14 | 6  | 1  | 1  | 1  | 0 |
| No  | 125 | 117 | 91 | 56 | 31 | 15 | 10 | 2 |

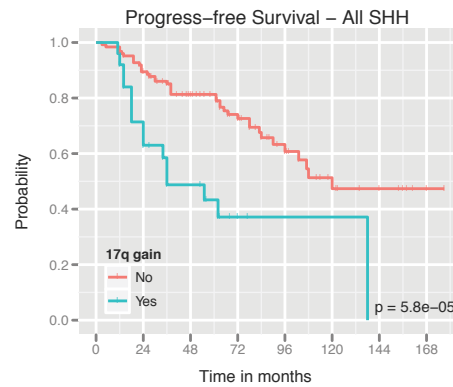

|     |     |     |    |    |    |    |   |   |
|-----|-----|-----|----|----|----|----|---|---|
| Yes | 25  | 15  | 10 | 4  | 1  | 1  | 0 | 0 |
| No  | 125 | 109 | 81 | 50 | 24 | 12 | 7 | 2 |

Supplement: NIHMS714712-supplement-2.pdf [file NIHMS714712-supplement-2.pdf]
